# Supplementary material
Source: PubMed Central journal article supplement (PMC2944489)
Supplement: 00115.2010_1.pdf [file 00115.2010_1.pdf]

1 **Supplementary Table 1. Sequences of primers used for real-time PCR**

2  
3 **Human**

| 4 <b>Target</b>   | 5 <b>Sequence</b>                                                 | 6 <b>Gene Bank ID<sup>#</sup></b> |
|-------------------|-------------------------------------------------------------------|-----------------------------------|
| 7 MR              | (S) - CGAGGAAGAGGTTCCGGTTCACC<br>8 (AS) - GCAATCCCGGTTCTCATGGC    | NM_002438.2                       |
| 9 AMAC1           | (S) - AGCTCTGCTGCCTCGTCTAT<br>10 (AS) - CCCACTTCTTATTGGGGTCA      | NM_002988.2                       |
| 11 CD163          | (S) - CTGGCGTGACATGTTCTGAT<br>12 (AS) - GGCTGCCTCCACCTCTAAGT      | NM_004244.4                       |
| 13 PPAR- $\alpha$ | (S) - GCACTGGAAGTGGATGACAG<br>14 (AS) - TTTAGAAGGCCAGGACGATCT     | NM_005036.4                       |
| 15 AMPK           | (S) - TCTCAGGAGGAGAGCTATTTGATT<br>16 (AS) - GAACAGACGCCGACTTTCTTT | NM_006251.5                       |

17  
18  
19  
20  
21 **Mouse**

| 22 <b>Target</b> | 23 <b>Sequence</b>                                       | 24 <b>Gene Bank ID<sup>#</sup></b> |
|------------------|----------------------------------------------------------|------------------------------------|
| 25 MR            | (S) - GGACGAGCAGGTGCAGTT<br>26 (AS) - CAACACATCCCGCCTTTC | NM_008625.1                        |
| 27 CD163         | (S) - TCAGTGCCTCTGCTGTCA<br>28 (AS) - CCAGTCTCAGTTCCTTCT | NM_053094.1                        |

29  
30
